1 **Holder Pasteurization Inactivates SARS-CoV-2 in Human Breast Milk**

2

3 Carina Conzelmann<sup>1\*</sup>, Rüdiger Groß<sup>1\*</sup>, Toni Luise Meister<sup>2\*</sup>, Daniel Todt<sup>2</sup>, Adalbert

4 Krawczyk<sup>3,4</sup>, Ulf Dittmer<sup>4</sup>, Steffen Stenger<sup>5</sup>, Jan Münch<sup>1</sup>, Eike Steinmann<sup>2</sup>, Janis A Müller<sup>1#</sup>,

5 Stephanie Pfaender<sup>2#</sup>

6

7 <sup>1</sup> Institute of Molecular Virology, Ulm University Medical Center, 89081 Ulm, Germany

8 <sup>2</sup> Department of Molecular and Medical Virology, Ruhr University Bochum, 44801 Bochum,

9 Germany

10 <sup>3</sup> Department of Infectious Diseases, West German Centre of Infectious Diseases, University

11 Hospital Essen, University of Duisburg-Essen, 45147 Essen, Germany

12 <sup>4</sup> Institute for Virology, University Hospital of Essen, University of Duisburg-Essen, 45147

13 Essen, Germany

14 <sup>5</sup> Institute for Microbiology and Hygiene, Ulm University Medical Center, 89081 Ulm,

15 Germany

16

17 \*equal contribution

18 #correspondence

19

20

21 **Abstract**

22 SARS-CoV-2 RNA has been detected in the human breast milk of infected mothers, raising  
23 concerns regarding the safety of breastfeeding upon infection. We here show that holder  
24 pasteurization inactivates SARS-CoV-2 and provides an alternative and safe option for  
25 infected mothers to continue feeding breast milk to their infants.

26 **Introduction**

27 The current coronavirus pandemic, caused by the severe acute respiratory syndrome  
28 coronavirus 2 (SARS-CoV-2), raises unprecedented questions regarding virus transmission  
29 and risks for pregnant or breastfeeding women. We and others recently described that SARS-  
30 CoV-2 is detectable in breast milk of infected mothers <sup>1-5</sup> and found viral RNA in single or  
31 multiple breast milk samples of mothers suffering from coronavirus disease 2019 (COVID-  
32 19). In two cases where the mother continued breastfeeding, the newborns were also tested  
33 positive for SARS-CoV-2 and one infant developed severe respiratory disease <sup>1,5</sup>. However,  
34 the origin of the infections of the newborns remained unclear and raises concerns of possible  
35 virus transmission via breast milk.

36 The safety and feasibility of breastfeeding is of high importance as breast milk contains  
37 nutrients, hormones, and immunoprotective entities that are essential for the development,  
38 health, and protection of the neonate from infections <sup>6</sup>. So far, the World Health Organization  
39 (WHO) recommends to continue breastfeeding upon SARS-CoV-2 infection of the mother  
40 while taking measures of strict hygiene and wearing masks to protect the child from droplets  
41 or aerosols <sup>7</sup>. The Centers for Disease Control and Prevention (CDC) states that the decision  
42 for breastfeeding lays with the mother, family and health care providers <sup>8</sup>. Generally, stopping  
43 breastfeeding is not advised, however, given the recent detection of SARS-CoV-2 in breast  
44 milk samples, a possible transmission of the virus via breastfeeding cannot be ruled out.  
45 Therefore, measures to provide safety of infants are urgently required. Thus, we here explored  
46 the inactivation of SARS-CoV-2 in human milk by holder pasteurization (heating to 63°C for  
47 30 minutes) to reduce the risk of a possible virus transmission while preserving many of  
48 milk's beneficial properties.

49

## 50 **Results**

51 To test if SARS-CoV-2 retains infectivity in human breast milk and to explore holder  
52 pasteurization as a possible inactivation method, we spiked five different SARS-CoV-2  
53 isolates from Germany, France and the Netherlands into five individual breast milk samples,  
54 and incubated them for 30 minutes at room temperature or 63°C. Samples were then titrated  
55 on cells and residual infectivity determined as tissue culture infectious dose 50 (TCID<sub>50</sub>). All  
56 five tested SARS-CoV-2 isolates (UKEssen, Ulm/01, Ulm/02, France/IDF0372,  
57 Netherlands/01) remained infectious in the milk samples that were incubated for 30 minutes at  
58 room temperature, with infectious titers of 0.09 to  $1.2 \times 10^5$  TCID<sub>50</sub>/mL (**Figure 1A, B**). Of  
59 note, in each milk sample, we detected a 40.9 – 92.8% decrease of viral titers compared to the  
60 medium control. This was independent of the viral strain, suggesting that this partial  
61 inactivation of virus is an intrinsic property of human milk, as previously described for many  
62 enveloped viruses including hepatitis C and Zika virus<sup>9–11</sup>. Importantly, upon pasteurization,  
63 no residual infectivity was detected in any of the samples (**Figure 1A, B**). Thus, human breast  
64 milk containing infectious SARS-CoV-2 can be efficiently inactivated using standard holder  
65 pasteurization.

66

## 67 **Discussion**

68 Breastfeeding provides many health benefits and is therefore recommended as the optimal  
69 feeding option for infants. Currently, the WHO recommends that SARS-CoV-2 infected  
70 mothers continue breastfeeding while taking measures of strict hygiene to protect the child  
71 from droplets or aerosols<sup>7</sup>. As initial reports failed to detect the presence of viral RNA in  
72 milk samples of infected mothers<sup>12,13</sup>, the risk of transmission via breastfeeding was deemed  
73 to be very low. Recent reports, however, demonstrate that SARS-CoV-2 RNA can be detected  
74 in breast milk samples after virus infection, associated with at least one newborn with severe  
75 respiratory disease<sup>1–5</sup>. These findings raise the concern of safety during breastfeeding and a

76 possible alternative or additional way of virus transmission to the infant. Holder  
77 pasteurization (heating to 63°C for 30 minutes) has been used for a long time to inactivate  
78 viral and bacterial agents, while at the same time preserving the many beneficial and  
79 protective effects of human breast milk <sup>6</sup>. Here, we evaluated holder pasteurization as an easy  
80 and inexpensive methods to inactivate infectious SARS-CoV-2 in breast milk. Our data show  
81 that independent of the tested SARS-CoV-2 isolates or the breast milk sample, viral  
82 infectivity is completely eliminated by this treatment. Thus, holder pasteurization provides  
83 safety for the infant and reassurance for the mother, who might consider discontinuing  
84 breastfeeding and substituting for infant formula milk that lacks many of the human milk's  
85 important components. In conclusion, we here provide a safe and feasible option, when in  
86 doubt, to continue feeding of the infant with breast milk upon symptomatic SARS-CoV-2  
87 infection of the mother.

88

## 89 **Methods**

90 **Cell culture.** Vero E6 (*Cercopithecus aethiops* derived epithelial kidney) cells were grown in  
91 Dulbecco's modified Eagle's medium (DMEM, Gibco) which was supplemented with 2.5%  
92 heat-inactivated fetal calf serum (FCS), 100 units/mL penicillin, 100 µg/mL streptomycin, 2  
93 mM L-glutamine, 1 mM sodium pyruvate, and 1x non-essential amino acids (DMEM  
94 complete). Caco-2 (human epithelial colorectal adenocarcinoma) cells were grown in DMEM  
95 complete but with supplementation of 10% FCS. All cells were grown at 37°C in a 5% CO<sub>2</sub>  
96 humidified incubator.

97 **Virus strains and virus propagation.** Viral isolate BetaCoV/France/IDF0372/2020 and  
98 BetaCoV/Netherlands/01 were obtained through the European Virus Archive global. The viral  
99 isolates BetaCoV/Germany/Ulm/01/2020, BetaCoV/Germany/Ulm/02/2020 and UKEssen  
100 were obtained from patient samples. Virus was propagated by inoculation of 70% confluent  
101 Vero E6 cells in 75 cm<sup>2</sup> cell culture flasks with 100 µl SARS-CoV-2 isolates in 3.5 ml serum-

102 free medium containing 1  $\mu\text{g/mL}$  trypsin. Cells were incubated for 2 h at 37°C, before adding  
103 20 ml medium containing 15 mM HEPES. Supernatant was harvested at day 3 post  
104 inoculation when a strong cytopathic effect (CPE) was visible. Supernatants were centrifuged  
105 for 5 min at 1,000  $\times$  g to remove cellular debris, and then aliquoted and stored at -80°C as  
106 virus stocks. Infectious virus titer was determined as plaque forming units or TCID<sub>50</sub>/mL.

107 **Milk samples.** Milk samples were obtained from five healthy human donors after ethical  
108 approval by the ethics commission of Hanover Medical School, Hanover, Germany and the  
109 ethics committee of Ulm University. All mothers provided written informed consent for the  
110 collection of samples and subsequent analysis. Milk was collected freshly and stored at -80°C  
111 until further use as anonymized samples.

112 **TCID<sub>50</sub> endpoint titration.** To determine the tissue culture infectious dose 50 (TCID<sub>50</sub>),  
113 virus stocks or samples were serially diluted and used to inoculate Vero E6 or Caco-2 cells.  
114 To this end, 20,000 cells were seeded per well in 96 flat bottom well plates and incubated  
115 over night. Cells were infected with SARS-CoV-2 in serial dilutions and incubated for 3-6  
116 days and monitored for CPE. TCID<sub>50</sub>/mL was calculated according to Spearman-Kärber.

117

Figure 1

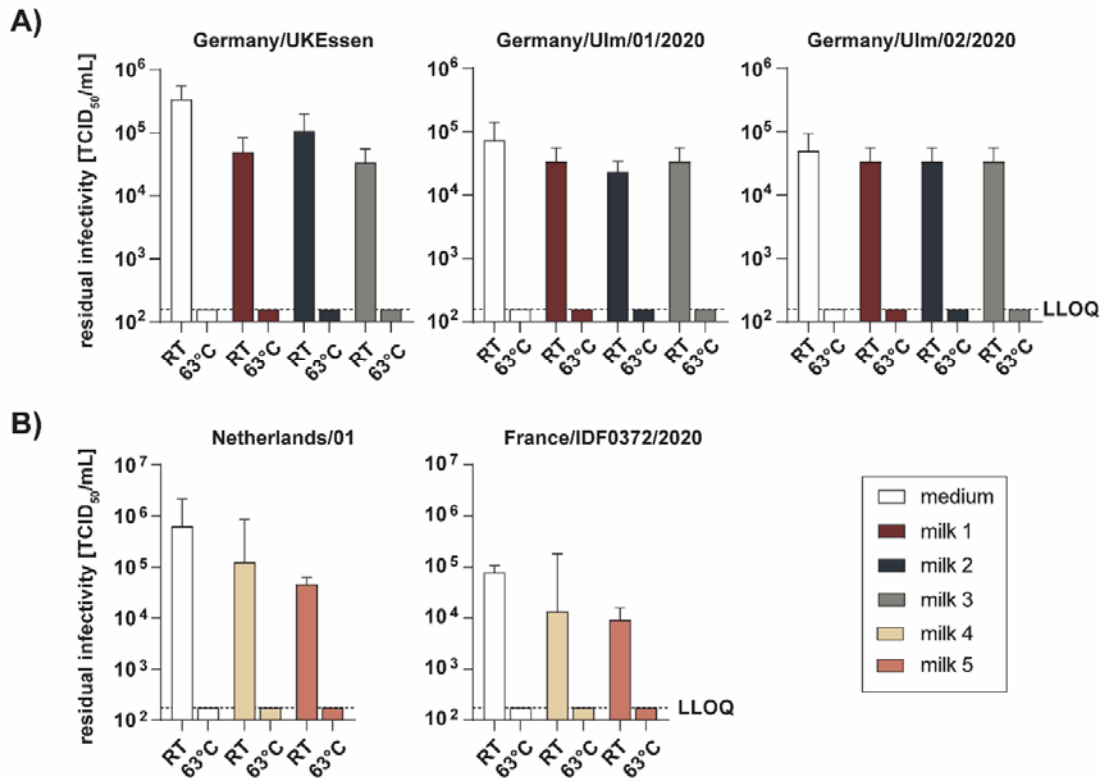

118

119

120 **Figure legends:**

121 **Figure 1. Holder Pasteurization inactivates SARS-CoV-2 in human breast milk.** SARS-

122 CoV-2 isolates UKEssen, Ulm/01, or Ulm/02 were spiked into medium or individual breast

123 milk samples from donors 1-3 (A), or isolates France/IDF0372 and Netherlands/01 into milk

124 samples from donors 4-5 (B), incubated for 30 minutes at room temperature (RT) or 63°C and

125 titrated onto Vero E6 (A) or Caco-2 (B) cells to determine infectious titers. Tissue culture

126 infectious dose 50 (TCID<sub>50</sub>) was calculated according to Spearman-Kärber. Data indicate

127 averages and standard deviation from two (B) or three (A) experiments. LLOQ lower limit of

128 quantitation (A, 158 TCID<sub>50</sub>/mL; B, 176 TCID<sub>50</sub>/mL).

129

130

131 **References**

- 132 1 Groß R, Conzelmann C, Müller JA, *et al.* Detection of SARS-CoV-2 in human  
133 breastmilk. *Lancet* 2020; **395**: 1757–8.
- 134 2 Wu Y, Liu C, Dong L, *et al.* Coronavirus disease 2019 among pregnant Chinese  
135 women: Case series data on the safety of vaginal birth and breastfeeding. *BJOG* 2020; :  
136 1–7.
- 137 3 Buonsenso D, Costa S, Sanguinetti M, *et al.* Neonatal Late Onset Infection with Severe  
138 Acute Respiratory Syndrome Coronavirus 2. *Am J Perinatol* 2020. DOI:10.1055/s-  
139 0040-1710541.
- 140 4 Kirtsman M, Diambomba Y, Poutanen SM, *et al.* Probable congenital SARS-CoV-2  
141 infection in a neonate born to a woman with active SARS-CoV-2 infection. *Can Med*  
142 *Assoc J* 2020; : cmaj.200821.
- 143 5 Tam PCK, Ly KM, Kernich ML, *et al.* Detectable severe acute respiratory syndrome  
144 coronavirus 2 (SARS-CoV-2) in human breast milk of a mildly symptomatic patient  
145 with coronavirus disease 2019 (COVID-19). *Clin Infect Dis* 2020; published online  
146 May 30. DOI:10.1093/cid/ciaa673.
- 147 6 Peila C, Moro GE, Bertino E, *et al.* The effect of holder pasteurization on nutrients and  
148 biologically-active components in donor human milk: A review. *Nutrients* 2016; **8**: 1–  
149 19.
- 150 7 World Health Organisation. Breastfeeding and COVID-19 for health workers:  
151 frequently asked questions. *Who* 2020. [www.who.int/publications-detail/clinical-](http://www.who.int/publications-detail/clinical-management-of-severe-acute-)  
152 [management-of-severe-acute-](http://www.who.int/publications-detail/clinical-management-of-severe-acute-).
- 153 8 US Centers for Disease Control and Prevention (CDC). Coronavirus Disease (COVID-  
154 19) and Breastfeeding. 2020. [https://www.cdc.gov/breastfeeding/breastfeeding-special-](https://www.cdc.gov/breastfeeding/breastfeeding-special-circumstances/maternal-or-infant-illnesses/covid-19-and-breastfeeding.html)  
155 [circumstances/maternal-or-infant-illnesses/covid-19-and-breastfeeding.html](https://www.cdc.gov/breastfeeding/breastfeeding-special-circumstances/maternal-or-infant-illnesses/covid-19-and-breastfeeding.html).
- 156 9 Pfaender S, Heyden J, Friesland M, *et al.* Inactivation of Hepatitis C Virus Infectivity



- 157 by Human Breast Milk. *J Infect Dis* 2013; **208**: 1943–52.
- 158 10 Pfaender S, Vielle NJ, Ebert N, Steinmann E, Alves MP, Thiel V. Inactivation of Zika  
159 virus in human breast milk by prolonged storage or pasteurization. *Virus Res* 2017;  
160 **228**: 58–60.
- 161 11 Conzelmann C, Zou M, Groß R, *et al.* Storage-Dependent Generation of Potent Anti-  
162 ZIKV Activity in Human Breast Milk. *Viruses* 2019; **11**: 591.
- 163 12 Lackey KA, Donovan SM, Pace RM, *et al.* SARS-CoV-2 and human milk: What is  
164 the evidence? 2020; : 1–12.
- 165 13 Goyal P. Clinical Characteristics of Covid-19 in China. *N Engl J Med* 2020; **382**:  
166 1859–62.

167

## 168 **Acknowledgements**

169 We would like to thank all mothers and all members of the mid wife team Luna who  
170 contributed to the milk donation. Furthermore, we are grateful to all members of the  
171 Department of Molecular and Medical Virology of the RUB for the helpful discussions. We  
172 thank Lisa Schwefele MD (Div. of Neonatology, Dept. of Pediatrics, Ulm University Medical  
173 Center, Germany) and Frank Reister MD (Div. of Obstetrics, Dept. of Obstetrics &  
174 Gynecology, Ulm University Medical Center, Germany) for reviewing the manuscript from a  
175 clinical point of view. We thank Karin Steinhart MD (Administrative District Heidenheim,  
176 Public Health Office, Heidenheim, Germany) for organizing milk samples and Tirza Braun  
177 for experimental assistance. This project has received funding from the European Union's  
178 Horizon 2020 research and innovation programme under grant agreement No 101003555  
179 (Fight-nCoV) to J.M., the German Research Foundation (CRC1279) to J.M. and S.S., and an  
180 individual research grant (to J.A.M.). J.A.M. is indebted to the Baden-Württemberg Stiftung  
181 for the financial support of this research project by the Eliteprogramme for Postdocs. C.C.,  
182 and R.G. are part of and R.G. is funded by a scholarship from the International Graduate

183 School in Molecular Medicine Ulm. AK received funding from the Stiftung

184 Universitätsmedizin Essen and the Rudolf Ackermann Foundation.

185

186
